# Supplementary material for: Increasing hospitalisation of patients with herpes zoster ophthalmicus—an interdisciplinary retrospective analysis
Source: Springer Nature journal article supplement (doi:10.1007/s00417-023-06277-w), 2023-10-20

**a** ophthalmology inpatient treatment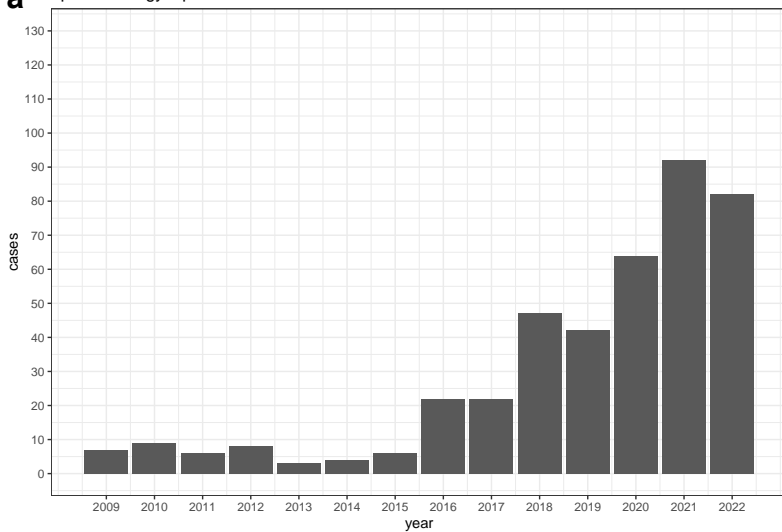**b** dermatology inpatient treatment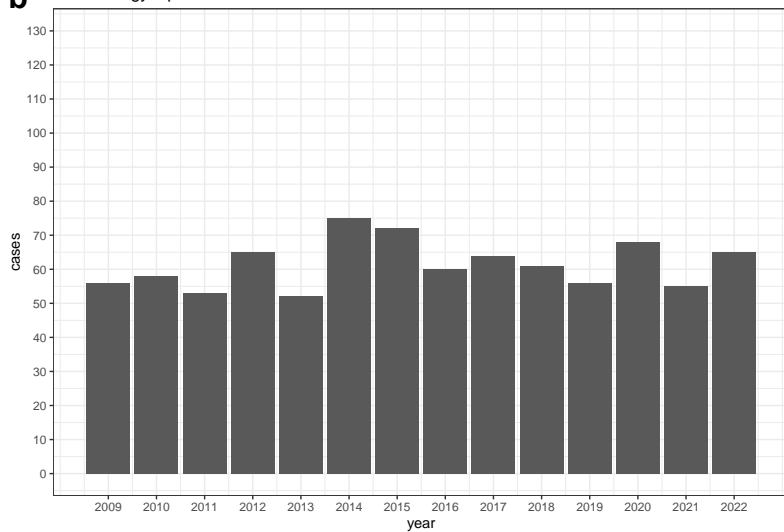**c** Zoster other localisations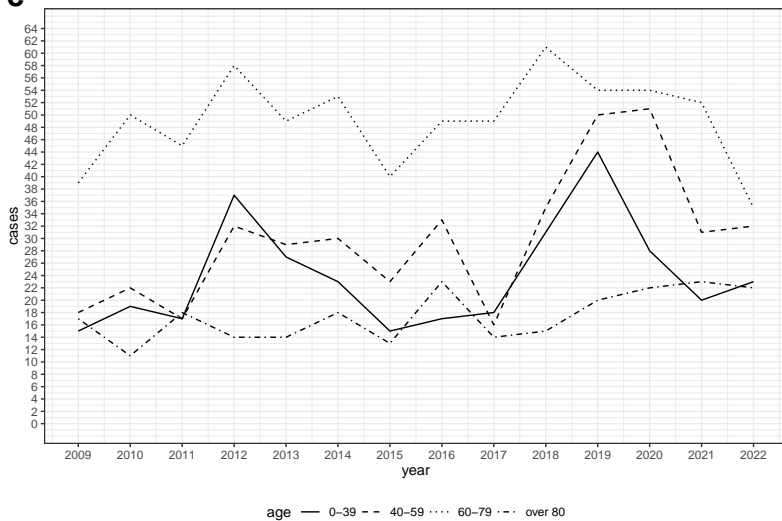**d**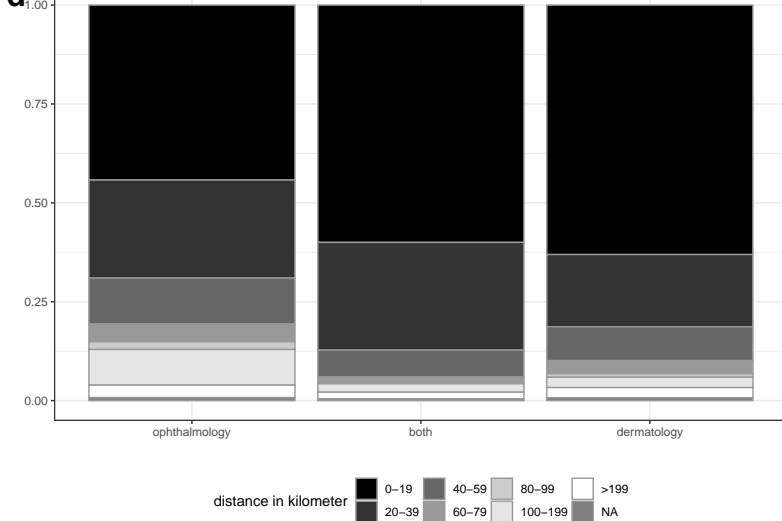

Supplement: MOESM1 [file 26207378]
